# Supplementary material for: Visual gene expression reveals a cone to rod developmental progression in deep-sea fishes
Source: bioRxiv or medRxiv preprint supplement (doi:10.1101/2020.05.25.114991), 2021-09-20
Supplement: Supplementary file [file media-1.pdf]

Supplementary Table 1: Expression of *cyp27c1* gene

| species                            | order              | stage                 | code         | raw reads  | reads after<br>bacteria<br>filtering | reads<br>(Zebrafish<br><i>cyp27c1</i> ) | reads<br>(Medaka<br><i>cyp27c1</i> ) | reads to most<br>common opsin |
|------------------------------------|--------------------|-----------------------|--------------|------------|--------------------------------------|-----------------------------------------|--------------------------------------|-------------------------------|
| <i>Anoplogaster cornuta</i>        | Trachichthyiformes | Larva                 | 39016        | 36,373,372 | 36,125,630                           | 6                                       | 39                                   | 620                           |
|                                    |                    | Larva                 | 39017        | 34,712,538 | 34,604,364                           | 3                                       | 14                                   | 1,257                         |
|                                    |                    | Larva                 | 4_23         | 41,592,840 | 41,519,070                           | 13                                      | 41                                   | 10,215                        |
|                                    |                    | Larva                 | 4_22         | 75,109,270 | 74,990,214                           | 4                                       | 11                                   | 133,480                       |
|                                    |                    | Larva                 | 4_21         | 28,945,804 | 28,869,552                           | 10                                      | 19                                   | 64,446                        |
|                                    |                    | Larva                 | 261s03       | 48,458,044 | 48,457,472                           | 3                                       | 4                                    | 12,913                        |
|                                    |                    | Adult                 | 56H6         | 11,658,040 | 11,635,610                           | 0                                       | 0                                    | 1,473                         |
| <i>Ceratoscopelus warmingii</i>    | Myctophiformes     | Adult                 | 300s03       | 49,078,974 | 44,114,639                           | 0                                       | 0                                    | 81,655                        |
|                                    |                    | Adult                 | S1           | 8,796,786  | 8,789,961                            | 5                                       | 8                                    | 16,378                        |
|                                    |                    | Adult                 | S2           | 8,655,248  | 8,649,342                            | 0                                       | 0                                    | 25,227                        |
|                                    |                    | Adult                 | S3           | 7,904,714  | 7,899,617                            | 0                                       | 0                                    | 20,815                        |
| <i>Chauliodus</i> sp.              | Stomiiformes       | Larva                 | 67I2_2       | 34,445,252 | 34,371,394                           | 0                                       | 0                                    | 150,691                       |
|                                    |                    | Larva                 | 67I1         | 20,701,686 | 20,683,764                           | 3                                       | 0                                    | 126,407                       |
|                                    |                    | Juvenile              | 109C7        | 32,865,334 | 32,834,300                           | 0                                       | 0                                    | 129,259                       |
|                                    |                    | Juvenile              | 109A2        | 25,389,318 | 25,344,182                           | 0                                       | 0                                    | 76,168                        |
|                                    |                    | Subadult              | 109D7        | 18,540,248 | 18,533,484                           | 0                                       | 0                                    | 121,329                       |
|                                    |                    | Adult                 | 109B6        | 24,854,866 | 24,835,646                           | 0                                       | 0                                    | 106,114                       |
|                                    |                    | Larva                 | 109G8        | 26,376,620 | 26,359,060                           | 0                                       | 0                                    | 102,195                       |
| <i>Coccorella atlantica</i>        | Aulopiformes       | Adult                 | 56C7         | 36,794,070 | 36,790,854                           | 0                                       | 0                                    | 37,155                        |
|                                    |                    | Adult                 | 297_7        | 43,948,534 | 40,511,279                           | 0                                       | 0                                    | 10,430                        |
|                                    |                    | Adult                 | 56H8         | 9,775,520  | 9,742,864                            | 0                                       | 0                                    | 6,691                         |
| <i>Grammastomias flagellibarba</i> | Stomiiformes       | Adult                 | 56H8         | 9,775,520  | 9,742,864                            | 0                                       | 0                                    | 6,691                         |
| <i>Gyrinomimus myersi</i>          | Beryciformes       | Larva                 | S25          | 19,270,096 | 19,122,986                           | 19                                      | 68                                   | 64,566                        |
| <i>Howella brodiei</i>             | Pempheriformes     | Adult                 | 56D8         | 56,905,264 | 43,936,178                           | 0                                       | 0                                    | 17,201                        |
|                                    |                    | Adult                 | 56D9         | 61,909,674 | 61,590,270                           | 0                                       | 3                                    | 166,291                       |
| <i>Hygophum reinhardtii</i>        | Myctophiformes     | Larva                 | 67I2_1       | 17,222,626 | 17,122,880                           | 0                                       | 0                                    | 45,449                        |
| <i>Idiacanthus fasciola</i>        | Stomiiformes       | Larva                 | 71C2         | 23,382,468 | 23,379,360                           | 1                                       | 0                                    | 688                           |
|                                    |                    | Larva                 | 67D2         | 6,647,384  | 6,623,496                            | 0                                       | 0                                    | 470                           |
|                                    |                    | Larva                 | 71C1         | 23,632,774 | 23,497,715                           | 0                                       | 0                                    | 610                           |
|                                    |                    | Larva                 | 67I7         | 25,713,960 | 25,701,768                           | 0                                       | 0                                    | 58,121                        |
|                                    |                    | Larva                 | 71B9         | 43,695,620 | 43,633,424                           | 0                                       | 0                                    | 50,709                        |
|                                    |                    | Larva                 | 67B8         | 28,333,642 | 28,313,024                           | 24                                      | 25                                   | 24,282                        |
|                                    |                    | Larva                 | 109A1        | 27,834,274 | 27,818,750                           | 0                                       | 0                                    | 268,778                       |
|                                    |                    | Adult                 | 228s01       | 21,704,528 | 21,622,274                           | 3                                       | 0                                    | 91,813                        |
|                                    |                    | Adult                 | 67F8         | 15,744,604 | 15,739,004                           | 0                                       | 0                                    | 35,904                        |
|                                    |                    | Adult                 | 67B6         | 11,368,044 | 15,439,954                           | 0                                       | 0                                    | 520                           |
|                                    |                    | <i>Melamphaes</i> sp. | Beryciformes | Juvenile   | 4_26                                 | 38,583,370                              | 38,534,507                           | 29                            |
| Juvenile                           | 4_28               |                       |              | 35,489,970 | 35,431,421                           | 4                                       | 35                                   | 29,336                        |
| <i>Melanolagus bericoides</i>      | Argentiformes      | Larva                 | 71H3         | 26,219,646 | 26,210,402                           | 0                                       | 0                                    | 209,343                       |
| <i>Pteraclis aesticola</i>         | Scombriformes      | Larva                 | 109H4        | 19,918,922 | 19,870,484                           | 0                                       | 0                                    | 2,490                         |
| <i>Pollichthys maui</i>            | Stomiiformes       | Adult                 | 109I2        | 55,767,498 | 54,875,747                           | 17                                      | 5                                    | 299,305                       |
|                                    |                    | Adult                 | 109I3        | 68,655,686 | 67,082,709                           | 0                                       | 0                                    | 388,496                       |
| <i>Scombrolabrax heterolepis</i>   | Scombriformes      | Adult                 | ,56E3        | 65,770,014 | 5,527,135                            | 1                                       | 12                                   | 47,072                        |
|                                    |                    | Adult                 | ,56E4        | 60,643,652 | 60,472,479                           | 0                                       | 15                                   | 28,231                        |
| <i>Scopelarchus</i> sp.            | Aulopiformes       | Larva                 | 71B7         | 43,695,620 | 43,682,534                           | 0                                       | 0                                    | 93,716                        |
|                                    |                    | Larva                 | 109H1        | 37,542,802 | 37,416,486                           | 0                                       | 0                                    | 30,914                        |
|                                    |                    | Larva                 | 109B9        | 9,971,250  | 9,919,148                            | 0                                       | 0                                    | 2,950                         |
|                                    |                    | Adult                 | 272_10       | 45,565,202 | 43,729,338                           | 0                                       | 0                                    | 10,929                        |
| <i>Scopelogadus mizolepis</i>      | Beryciformes       | Adult                 | ,57E2        | 5,160,876  | 5,160,876                            | 0                                       | 4                                    | 76,858                        |
|                                    |                    | Adult                 | 300s01       | 15,448,240 | 15,420,650                           | 0                                       | 0                                    | 11,449                        |
| <i>Scopelosaurus hoedti</i>        | Aulopiformes       | Adult                 | 297_9        | 43,948,534 | 42,248,053                           | 0                                       | 0                                    | 1,454                         |
| <i>Vinciguerria poweriae</i>       | Stomiiformes       | Larva                 | 109H2        | 25,863,628 | 25,755,100                           | 0                                       | 0                                    | 61,859                        |
|                                    |                    | Larva                 | 109C8        | 22,914,004 | 22,858,398                           | 0                                       | 0                                    | 16,118                        |
